# Supplementary material for: Construction and engineering of an interfacial structure in a Cux/FeMgOy catalyst for the photoreduction of CO2 to ethylene
Source: Royal Society of Chemistry journal article supplement (doi:10.1039/d2cy02138b), 2023-01-01
Supplement: d2cy02138b1.pdf [file d2cy02138b1.pdf]

Supporting information

## Construction and Engineering of Interfacial Structure in $\text{Cu}_x/\text{FeMgO}_y$ Catalyst for Photoreduction of $\text{CO}_2$ to Ethylene

He Yu,<sup>1</sup> Baoai Fu,<sup>1</sup> Fengzhi Fu,<sup>2</sup> Yanfei Zhu,<sup>1</sup> Yanan Liu,<sup>1,\*</sup> Junting Feng<sup>1,\*</sup>, Dianqing Li<sup>1</sup>

<sup>1</sup>State Key Laboratory of Chemical Resource Engineering, Beijing Engineering Center for Hierarchical Catalysts, Beijing University of Chemical Technology, Beijing, 100029, China

<sup>2</sup>Hengshui High School of Hebei, Hebei, 053099, China

\* Corresponding author

Address: Box 98, 15 Bei San Huan East Road, Beijing 100029, China

Tel: +86 10 64436992 Fax: +86 10 64436992

E-mail: [ynliu@mail.buct.edu.cn](mailto:ynliu@mail.buct.edu.cn) (Yanan Liu); [fengjt@mail.buct.edu.cn](mailto:fengjt@mail.buct.edu.cn) (Junting Feng)

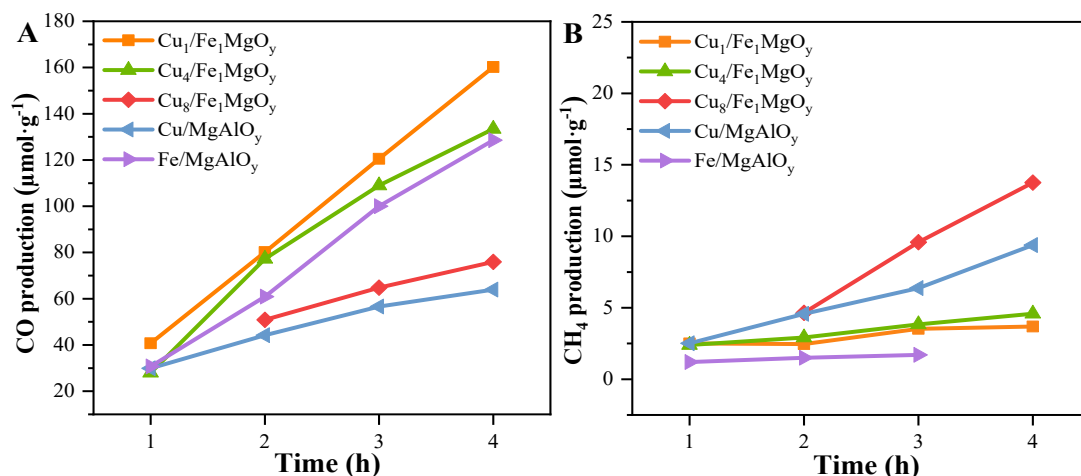

Figure S1. Production of (A) CO, (B) CH<sub>4</sub> on  $\text{Cu}_x/\text{Fe}_1\text{MgO}_y$ ,  $\text{Cu}/\text{MgAlO}_y$  and  $\text{Fe}/\text{MgAlO}_y$  catalysts

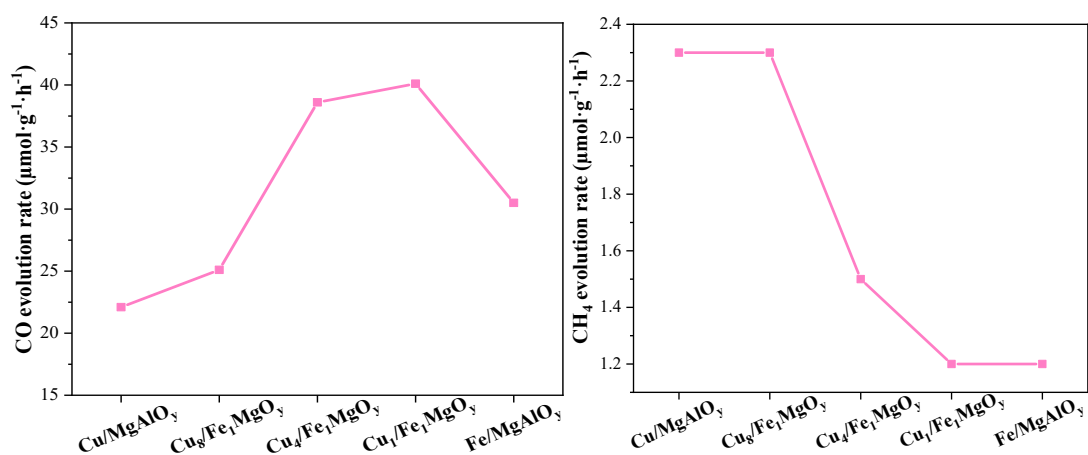

**Figure S2.** Evolution rate of CO and CH<sub>4</sub> at 2h over Cu<sub>x</sub>/Fe<sub>1</sub>MgO<sub>y</sub>, Cu/MgAlO<sub>y</sub> and Fe/MgAlO<sub>y</sub> catalysts

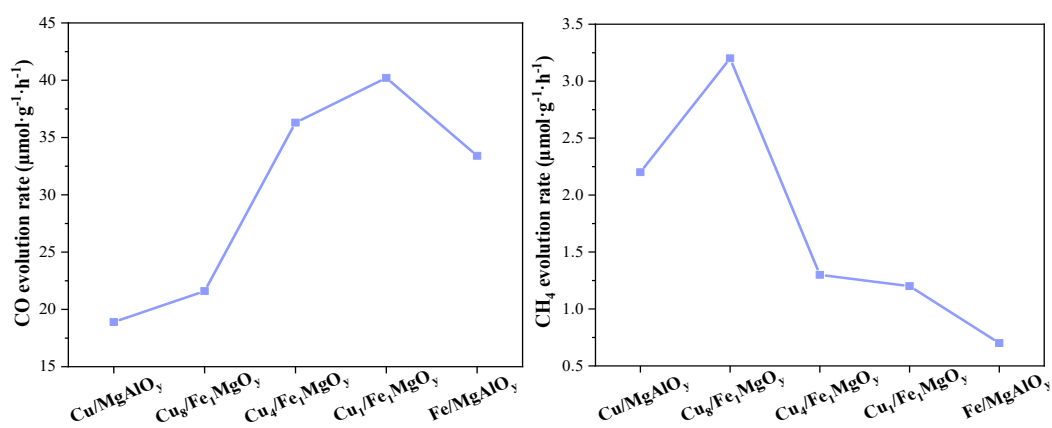

**Figure S3.** Evolution rate of CO and CH<sub>4</sub> at 3h over Cu<sub>x</sub>/Fe<sub>1</sub>MgO<sub>y</sub>, Cu/MgAlO<sub>y</sub> and Fe/MgAlO<sub>y</sub> catalysts

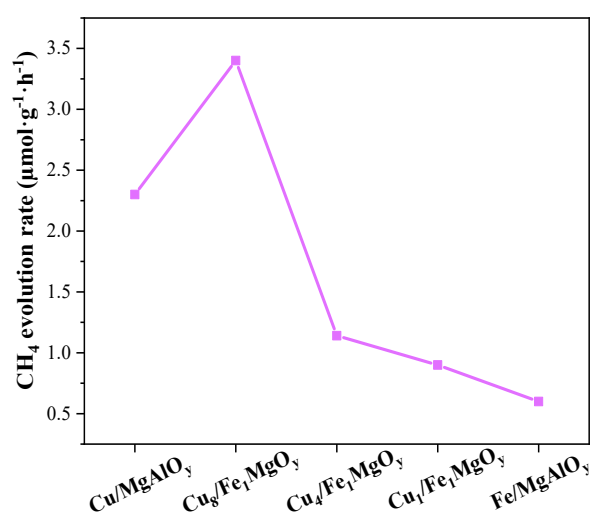

**Figure S4.** Evolution rate of CH<sub>4</sub> at 4h over Cu<sub>x</sub>/Fe<sub>1</sub>MgO<sub>y</sub>, Cu/MgAlO<sub>y</sub> and Fe/MgAlO<sub>y</sub> catalysts

**Table S1.** Performance comparison of Cu<sub>1</sub>/Fe<sub>1</sub>MgO<sub>y</sub> and some reported photocatalysts for CO<sub>2</sub> reduction

| Catalysts                                                            | catalyst mass (mg) | Product evolution rate ( $\mu\text{mol g}^{-1} \text{h}^{-1}$ ) |                 |                               |
|----------------------------------------------------------------------|--------------------|-----------------------------------------------------------------|-----------------|-------------------------------|
|                                                                      |                    | CO                                                              | CH <sub>4</sub> | C <sub>2</sub> H <sub>4</sub> |
| Cu <sub>1</sub> /Fe <sub>1</sub> MgO <sub>y</sub>                    | 1                  | 40.1                                                            | 0.9             | 9.9                           |
| 6%CuO/WO <sub>3</sub> <sup>1</sup>                                   | 50                 | 1.6                                                             | -               | -                             |
| 3%Pt/p-C <sub>3</sub> N <sub>4</sub> <sup>2</sup>                    | 100                | 4.7                                                             | 4.0             | -                             |
| Cu <sup>δ+</sup><br>/CeO <sub>2</sub> -TiO <sub>2</sub> <sup>3</sup> | 10                 | 3.5                                                             | 1.6             | 4.5                           |
| Cu <sub>2</sub> O@Cu@UiO-<br>66-NH <sub>2</sub> <sup>4</sup>         | 3                  | 20.9                                                            | 8.3             | -                             |
| Ag/TiO <sub>2</sub> <sup>5</sup>                                     | 10                 | 5.2                                                             | -               | -                             |
| α-Fe <sub>2</sub> O <sub>3</sub> /BCN <sup>6</sup>                   | 4                  | 11.0                                                            | 0.7             | -                             |
| α-Fe <sub>2</sub> O <sub>3</sub> /Cu <sub>2</sub> O <sup>7</sup>     | 100                | 3.1                                                             | 0.6             | -                             |
| Cu@Cu <sub>2</sub> O/N-GCs <sup>8</sup>                              | 50                 | 4.0                                                             | 5.6             | -                             |
| Ni-SA-x/ZrO <sub>2</sub> <sup>9</sup>                                | 10                 | 11.8                                                            | -               | -                             |
| Ru-Bi <sub>2</sub> MoO <sub>6</sub> <sup>10</sup>                    | 30                 | 23.8                                                            | -               | -                             |
| ZnSe-<br>CsSnCl <sub>3</sub> <sup>11</sup>                           | 5                  | 54.0                                                            | 3.0             | -                             |
| TiO <sub>2</sub> @Cu <sup>12</sup>                                   | 10                 | 25.4                                                            | 5.8             | -                             |
| SnTa <sub>2</sub> O <sub>6</sub> <sup>13</sup>                       | 20                 | 31                                                              | -               | -                             |
| Mn:CsPb(Cl/Br) <sub>3</sub> <sup>14</sup>                            | 10                 | 64                                                              | -               | -                             |
| Pt SA/ZrO <sub>2</sub> <sup>15</sup>                                 | 20                 | 16.6                                                            | 0.4             | -                             |
| BiOI <sub>3</sub> nanostrips <sup>16</sup>                           | 20                 | 17.33                                                           | -               | -                             |
| Au <sub>S</sub> A Cd <sub>1-x</sub> S <sup>17</sup>                  | 30                 | 32.2                                                            | 11.3            | -                             |
| CeO <sub>2</sub> @CdS-Cu <sub>x</sub> S <sub>y</sub> <sup>18</sup>   | 5                  | -                                                               | 18.2            | -                             |
| Cu/Fe-CNC <sup>19</sup>                                              | 20                 | 6.66                                                            | -               | -                             |

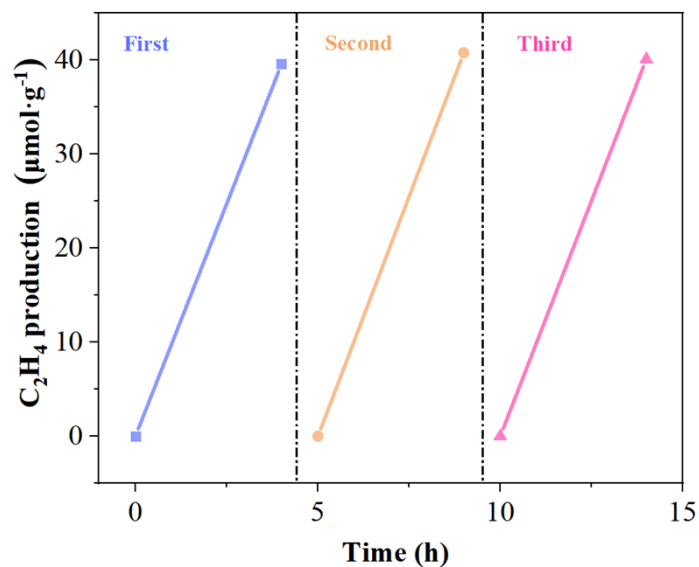

Figure S5. Recycling experiments of Cu<sub>1</sub>/Fe<sub>1</sub>MgO<sub>y</sub> photocatalyst for three cycles

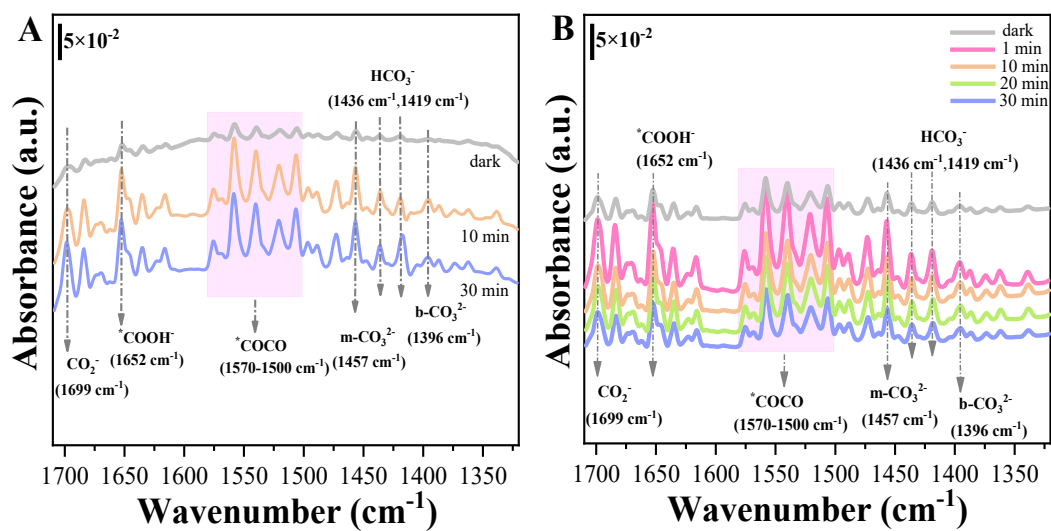

Figure S6. In situ FTIR spectra of humid CO<sub>2</sub> adsorbed on (A) Cu<sub>4</sub>/Fe<sub>1</sub>MgO<sub>y</sub> and (B) Fe/MgAlO<sub>y</sub>

## REFERENCES

---

- 1 Xie, Z. K.; Xu, Y. Y.; Li, D. et al. Construction of CuO quantum Dots/WO<sub>3</sub> nanosheets 0D/2D Z-scheme heterojunction with enhanced photocatalytic CO<sub>2</sub> reduction activity under visible-light. *J. Alloys Compd.* **2021**, 858, 157668.
- 2 Kočí, K.; Van, H. D.; Edelmannová, M. et al. Photocatalytic reduction of CO<sub>2</sub> using Pt/C<sub>3</sub>N<sub>4</sub> photocatalysts. *Appl. Surf. Sci.* **2020**, 503, 144426.
- 3 Wang, T.; Chen, L.; Chen, C. et al. Engineering Catalytic Interfaces in Cu<sup>δ+</sup>/CeO<sub>2</sub>-TiO<sub>2</sub> Photocatalysts for Synergistically Boosting CO<sub>2</sub> Reduction to Ethylene. *ACS Nano.* **2022**, 16, 2, 2306-2318.
- 4 Wang, S. Q.; Zhang, Xi. Y.; Dao, X. Y. et al. Cu<sub>2</sub>O@Cu@UiO-66-NH<sub>2</sub> Ternary Nanocubes for Photocatalytic CO<sub>2</sub> Reduction. *ACS Appl. Nano Mater.* **2020**, 3, 10, 10437-10445.
- 5 Jin, Lei.; Shaaban, E.; Bamonte, Scott. et al. Surface Basicity of Metal@TiO<sub>2</sub> to Enhance Photocatalytic Efficiency for CO<sub>2</sub> Reduction. *ACS Appl. Mater. Interfaces.* **2021**, 13, 38595-38603.
- 6 Wang, X. H.; Liang, F.; Gu, H. H. et al. In situ synthesized α-Fe<sub>2</sub>O<sub>3</sub>/BCN heterojunction for promoting photocatalytic CO<sub>2</sub> reduction performance. *J. Colloid Interface Sci.* **2022**, 621, 311-320.
- 7 Wang, J. C.; Zhang, L.; Fang, W. X. et al. Enhanced Photoreduction CO<sub>2</sub> Activity over Direct Z-Scheme α-Fe<sub>2</sub>O<sub>3</sub>/Cu<sub>2</sub>O Heterostructures under Visible Light Irradiation. *ACS Appl. Mater. Interfaces.* **2015**, 7, 16, 8631-8639.
- 8 He, L.; Zhang, W. Y.; Zhao, K. et al. Core-shell Cu@Cu<sub>2</sub>O nanoparticles embedded in 3D honeycomb-like N-doped graphitic carbon for photocatalytic CO<sub>2</sub> reduction. *J. Mater. Chem. A.* **2022**, 10, 4758.
- 9 Xiong, X. Y.; Mao, C. L.; Yang, Z. J. et al. Photocatalytic CO<sub>2</sub> Reduction to CO over Ni Single Atoms Supported on Defect-Rich Zirconia. *Adv. Energy Mater.* **2020**, 10, 2002928.
- 10 Ren, G. M.; Liu, S. Tong.; Li, Z. Z. et al. Highly Selective Photocatalytic Reduction of CO<sub>2</sub> to CO Over Ru-Modified Bi<sub>2</sub>MoO<sub>6</sub>. *Sol. RRL.* **2022**.
- 11 Li, N. Ya.; Chen, X. J.; Wang, J. et al. ZnSe Nanorods-CsSnCl<sub>3</sub> Perovskite Heterojunction Composite for Photocatalytic CO<sub>2</sub> Reduction. *ACS Nano.* **2022**, 16, 3332-3340.
- 12 Liu, M.; Zheng, L. R.; Bao, X. L. et al. Substrate-dependent ALD of Cu<sup>x</sup> on TiO<sub>2</sub> and its performance in photocatalytic CO<sub>2</sub> reduction. *Chem. Eng. J.* **2021**, 405, 126654.
- 13 Zhao, J. G.; Xiong, Z.; Wang, J. Y. et al. SnTa<sub>2</sub>O<sub>6</sub>: A novel CO<sub>2</sub> reduction photocatalyst with nearly 100% CO selectivity. *Chem. Eng. J.* **2022**, 446, 137242.
- 14 Wang, J.; Xiong, L.; Bai, Y. et al. Mn-Doped Perovskite Nanocrystals for Photocatalytic CO<sub>2</sub> Reduction: Insight into the Role of the Charge Carriers with Prolonged Lifetime. *Sol. RRL.* **2022**.
- 15 Dong, S.; Liu, W.; Liu, S. et al. Single atomic Pt on amorphous ZrO<sub>2</sub> nanowires for advanced photocatalytic CO<sub>2</sub> reduction. *Mater. Today.* **2022**, 17, 100157.
- 16 Chen, F.; Ma, Z. Y.; Ye, L. Q. et al. Macroscopic Spontaneous Polarization and Surface Oxygen Vacancies Collaboratively Boosting CO<sub>2</sub> Photoreduction on BiOIO<sub>3</sub> Single Crystals. *Adv. Mater.* **2020**, 32, 1908350.

- 
- 17 Cao, Y.; Guo, L.; Dan, M. et al. Modulating electron density of vacancy site by single Au atom for effective CO<sub>2</sub> photoreduction. *Nat Commun* **2021**, 12, 1675.
- 18 Guan, Z. F.; Chen, Y. J.; Han, W. et al. Engineering tandem double p-n heterostructured CeO<sub>2</sub>@CdS-Cu<sub>8</sub>S<sub>5</sub> hollow spheres for remarkable photocatalytic CO<sub>2</sub> reduction. *Appl. Surf. Sci.* **2023**, 616, 156433.
- 19 Bian, S. Y.; Li, X. Y.; Zhang, L. et al. Bimetal Cu and Fe modified g-C<sub>3</sub>N<sub>4</sub> sheets grown on carbon skeleton for efficient and selective photocatalytic reduction of CO<sub>2</sub> to CO. *J. Environ. Chem. Eng.* **2023**, 11, 109319.
